# Supplementary material for: Identification of promising lung cancer drug targets from human plasma proteins: Mendelian randomization, single-cell RNA sequencing analysis
Source: Research Square preprint supplement (doi:10.21203/rs.3.rs-6514191/v1), 2025-05-13
Supplement: Supplementary file 1 [file 58aabd067cb696025972599a.xlsx]

## Sheet: table1
id.exposure	id.outcome	outcome	exposure	method	nsnp	b	se	pval	lo_ci	up_ci	or	or_lci95	or_uci95
14150_7_IL36A_IL_1F6	ebi-a-GCST90018875	lung cancer	IL36A	Inverse variance weighted	4	0.182612279689827	0.0729059976029198	0.0122533305249028	0.0397165243881041	0.325508034991549	1.20034891819184	1.04051577153631	1.38473396061738
9172_69_MMP8_MMP_8	ebi-a-GCST90018875	lung cancer	MMP8	Inverse variance weighted	12	-0.141712	0.0572159782215864	0.013257107166399	-0.253855	-0.0295685	0.867871359399745	0.775804210976591	0.97086440858348
15569_15_COL2A1_Collagen_II	ebi-a-GCST90018875	lung cancer	COL2A1	Inverse variance weighted	6	-0.246325	0.102065477058978	0.0158044718446324	-0.446373	-0.0462765	0.781668294563381	0.639944938956098	0.954777959057413
3166_92_CD33_Siglec_3	ebi-a-GCST90018875	lung cancer	CD33	Inverse variance weighted	13	0.0778689075337219	0.0322821367654809	0.0158593601134017	0.0145959194733793	0.141141895594065	1.08098094092368	1.0147029600572	1.15158804166134
3235_50_WFIKKN2_WFKN2	ebi-a-GCST90018875	lung cancer	WFIKKN2	Inverse variance weighted	10	0.0936133563564349	0.0392283396420555	0.0170155943700652	0.0167258106580061	0.170500902054864	1.09813507687742	1.01686647014949	1.18589872167906
16594_44_FAIM_FAIM1	ebi-a-GCST90018875	lung cancer	FAIM	Inverse variance weighted	10	0.146597626840309	0.0620047751171685	0.0180643848039164	0.0250682676106591	0.26812698606996	1.1578879662443	1.02538511872716	1.30751316543155
6411_58_DEFB135_DB135	ebi-a-GCST90018875	lung cancer	DEFB135	Inverse variance weighted	4	-0.268827	0.114214729012257	0.018587787601815	-0.492688	-0.0449659	0.764275622844675	0.610982072885923	0.956030059794696
15574_37_CCNA2_Cyclin_A	ebi-a-GCST90018875	lung cancer	CCNA2	Inverse variance weighted	3	0.357782303083084	0.15290850179666	0.0192917074255569	0.0580816395616303	0.657482966604538	1.43015424641838	1.0598015139096	1.92992852124101
11444_49_POLR3F_RPC6	ebi-a-GCST90018875	lung cancer	POLR3F	Inverse variance weighted	3	0.443721881026035	0.190775333977992	0.0200245764321193	0.0698022264291708	0.817641535622899	1.55849697776095	1.07229608845533	2.26515125424817
17397_8_HSD17B11_DHB11	ebi-a-GCST90018875	lung cancer	HSD17B11	Inverse variance weighted	3	0.419086455400921	0.181314383786382	0.0208118701022081	0.063710263179612	0.77446264762223	1.5205718107531	1.06578355728318	2.16942606766322
8074_32_TMEM70_TMM70	ebi-a-GCST90018875	lung cancer	TMEM70	Inverse variance weighted	6	0.247731108588852	0.107787123587583	0.0215426296874628	0.0364683463571893	0.458993870820515	1.28111540494681	1.03714147419239	1.58248100344271
4479_14_SERPING1_C1_Esterase_Inhibitor	ebi-a-GCST90018875	lung cancer	SERPING1	Inverse variance weighted	14	-0.116047	0.0507935659267263	0.022331607985184	-0.215602	-0.0164916	0.890433340136951	0.806055705823423	0.983643596217078
17153_46_KIR2DL3_KI2L3	ebi-a-GCST90018875	lung cancer	KIR2DL3	Inverse variance weighted	13	-0.105896	0.0472366403384123	0.0249725481526072	-0.19848	-0.0133126	0.899517850325881	0.819976009276694	0.986775654288513
9989_12_LRRC24_LRC24	ebi-a-GCST90018875	lung cancer	LRRC24	Inverse variance weighted	3	0.387680676112648	0.175022091315214	0.0267574199016359	0.0446373771348296	0.730723975090467	1.4735591665111	1.04564861505469	2.07658345829235
8922_4_TMCC3_TMCC3	ebi-a-GCST90018875	lung cancer	TMCC3	Inverse variance weighted	12	0.108061199437246	0.0489571427025139	0.0272958193398087	0.0121051997403188	0.204017199134173	1.11411592656785	1.01217876420854	1.22631924490406
13093_6_SECTM1_SECTM1	ebi-a-GCST90018875	lung cancer	SECTM1	Inverse variance weighted	10	0.128752796931306	0.0584559199237928	0.0276256238186778	0.014179193880672	0.24332639998194	1.13740891843471	1.01428019545928	1.27548487442269
12370_30_APOF_Apo_F	ebi-a-GCST90018875	lung cancer	APOF	Inverse variance weighted	9	0.177982940914889	0.0818958532467595	0.0297589550301853	0.01746706855124	0.338498813278537	1.19480493878181	1.01762050988128	1.40284008417238
8874_53_CLN5_CLN5	ebi-a-GCST90018875	lung cancer	CLN5	Inverse variance weighted	3	0.227109035451298	0.105188069445503	0.0308442718281889	0.0209404193381132	0.433277651564483	1.25496669634067	1.02116120836432	1.54230438448297
3030_3_CLEC4M_DC_SIGNR	ebi-a-GCST90018875	lung cancer	CLEC4M	Inverse variance weighted	4	-0.257043	0.119229150649615	0.0310936289394945	-0.490732	-0.0233537	0.773335085691688	0.612178132720267	0.976916885456682
4145_58_NTF3_Neurotrophin_3	ebi-a-GCST90018875	lung cancer	NTF3	Inverse variance weighted	5	0.271147691288648	0.126305757889188	0.0318126818422275	0.0235884058258393	0.518706976751456	1.31146874859144	1.02386881271362	1.67985415433597
8336_267_GRAMD1C_GRM1C	ebi-a-GCST90018875	lung cancer	GRAMD1C	Inverse variance weighted	9	0.113260299907403	0.0528272536495311	0.0320349070224029	0.00971888275432192	0.216801717060484	1.11992341097126	1.00976626447003	1.24209779091776
11433_11_TCTN2_TECT2	ebi-a-GCST90018875	lung cancer	TCTN2	Inverse variance weighted	3	0.14035541462133	0.0654882017581641	0.0320956933943482	0.0119985391753288	0.268712290067332	1.15068269564352	1.01207081040699	1.30827868212203
18241_18_CPOX_HEM6	ebi-a-GCST90018875	lung cancer	CPOX	Inverse variance weighted	16	0.12903626134425	0.0602531365668292	0.0322281645936168	0.0109401136732646	0.247132409015235	1.13773137908695	1.01100017554493	1.28034863125656
8055_33_DGCR2_IDD	ebi-a-GCST90018875	lung cancer	DGCR2	Inverse variance weighted	3	0.4530778742766	0.212462952008712	0.0329655213253839	0.0366504883395239	0.869505260213676	1.57314668940462	1.03733039840146	2.38573024582951
5000_52_LGALS3BP_LG3BP	ebi-a-GCST90018875	lung cancer	LGALS3BP	Inverse variance weighted	19	0.0974340988342173	0.0463463768645757	0.0355267953926794	0.00659520017964904	0.188272997488786	1.10233879375797	1.00661699640283	1.20716302284399
3858_5_ACP1_PPAC	ebi-a-GCST90018875	lung cancer	ACP1	Inverse variance weighted	10	-0.0872398	0.0416272252578899	0.0361052745479843	-0.168829	-0.00565047	0.916457270820198	0.84465316084777	0.994365460488199
9541_15_B3GALT1_B3GT1	ebi-a-GCST90018875	lung cancer	B3GALT1	Inverse variance weighted	3	0.42923380065129	0.204879155640946	0.0361657993397731	0.0276706555950352	0.830796945707545	1.53608012895203	1.02805704382442	2.29514711925289
5749_53_CLPS_COL	ebi-a-GCST90018875	lung cancer	CLPS	Inverse variance weighted	8	-0.0798036	0.0383560137788047	0.037470312699919	-0.154981	-0.00462583	0.923297650495893	0.856431105331634	0.995384854781906
9853_3_IFIT2_IFIT2	ebi-a-GCST90018875	lung cancer	IFIT2	Inverse variance weighted	5	0.211371268787677	0.101610048656994	0.037505346548905	0.0122155734199688	0.410526964155386	1.23537092459536	1.0122904882688	1.5076120333261
3796_79_ANGPTL4_ANGL4	ebi-a-GCST90018875	lung cancer	ANGPTL4	Inverse variance weighted	6	0.12373419860642	0.0595325823390338	0.0376699366044486	0.00705033722191392	0.240418059990926	1.13171501958824	1.0070752493613	1.27178071983588
9927_96_TNS4_TENS4	ebi-a-GCST90018875	lung cancer	TNS4	Inverse variance weighted	4	0.168286440781159	0.0810118574754456	0.0377732992693808	0.00950320012928532	0.327069681433032	1.18327550046824	1.0095484989164	1.38689811486145
17148_7_BLVRB_BLVRB	ebi-a-GCST90018875	lung cancer	BLVRB	Inverse variance weighted	4	-0.223328	0.108106184367151	0.038845470832808	-0.435216	-0.0114398	0.799852513022852	0.647124841692958	0.988625380097092
15504_39_BIRC7_Livin_B	ebi-a-GCST90018875	lung cancer	BIRC7	Inverse variance weighted	4	0.136429161885846	0.0663256777661556	0.0396902248887997	0.00643083346418089	0.266427490307511	1.14617368211779	1.00645155567024	1.30529293951421
13691_10_SLC5A8_SC5A8	ebi-a-GCST90018875	lung cancer	SLC5A8	Inverse variance weighted	23	0.0832050306467643	0.0405851349673679	0.0403511987662215	0.00365816611072335	0.162751895182805	1.08676460575733	1.00366486536688	1.17674469743958
3195_50_GNLY_Granulysin	ebi-a-GCST90018875	lung cancer	GNLY	Inverse variance weighted	26	-0.0724428	0.0354008051754862	0.0407208241214391	-0.141828	-0.00305726	0.930118908669271	0.867770135393864	0.996947404592869
11228_37_RIC3_RIC3	ebi-a-GCST90018875	lung cancer	RIC3	Inverse variance weighted	4	-0.30439	0.149408022896817	0.0416195983672668	-0.597229	-0.0115498	0.737573491610133	0.550334352970062	0.988516621922669
9805_51_SEMA4B_SEM4B	ebi-a-GCST90018875	lung cancer	SEMA4B	Inverse variance weighted	5	0.25968969628235	0.127831509233622	0.0422043112145065	0.00913993818444991	0.51023945438025	1.29652770687155	1.00918183496684	1.66569000396328
19579_5_DEFA1_HNP_1	ebi-a-GCST90018875	lung cancer	DEFA1	Inverse variance weighted	6	-0.202635	0.0998488673400776	0.0424161741359711	-0.398338	-0.00693088	0.816576518182584	0.671434751453055	0.993093087011317
4148_49_PAPPA_PAPP_A	ebi-a-GCST90018875	lung cancer	PAPPA	Inverse variance weighted	20	0.0909766855629301	0.0449411021420006	0.0429337739375525	0.00289212536460889	0.179061245761251	1.09524346997584	1.0028963115939	1.19609399761204
4771_10_SMPDL3A_ASM3A	ebi-a-GCST90018875	lung cancer	SMPDL3A	Inverse variance weighted	8	0.110503162398508	0.0550184238836809	0.0445927754452736	0.00266705158649296	0.218339273210522	1.11683988093931	1.00267061133255	1.24400905497651
5100_53_SCARB2_LIMP_II	ebi-a-GCST90018875	lung cancer	SCARB2	Inverse variance weighted	3	0.398796518210564	0.200433293818038	0.0466270759563279	0.00594726232720932	0.791645774093919	1.49003039370725	1.00596498240303	2.20702570467993
6940_18_JPH1_JPH1	ebi-a-GCST90018875	lung cancer	JPH1	Inverse variance weighted	7	-0.199807	0.100910989860323	0.047700182798716	-0.397592	-0.00202122	0.818888975968062	0.671935916791921	0.9979808166285
3651_50_KDR_VEGF_sR2	ebi-a-GCST90018875	lung cancer	KDR	Inverse variance weighted	18	-0.0832057	0.0420895722667427	0.0480560495978808	-0.165701	-0.000710154	0.920161835858054	0.847299303746018	0.999290097874865
15475_4_PLTP_PLTP	ebi-a-GCST90018875	lung cancer	PLTP	Inverse variance weighted	18	-0.0863783	0.0437980273312373	0.0485871947294712	-0.172222	-0.000534177	0.917247161615791	0.841791900975908	0.999465966014687
6425_87_MMP19_MMP19	ebi-a-GCST90018875	lung cancer	MMP19	Inverse variance weighted	9	0.122860481296358	0.0624100268781231	0.0489988540485376	0.00053682861523642	0.245184133977479	1.1307266524252	1.00053697273351	1.27785658835941
15548_35_PHGDH_SERA	ebi-a-GCST90018875	lung cancer	PHGDH	Inverse variance weighted	11	0.094935700004867	0.0482652984381166	0.049188327431546	0.000335715066158412	0.189535684943576	1.09958814934029	1.00033577142477	1.20868825519205

## Sheet: Reverse Mendelian randomization
id.exposure	id.outcome	outcome	exposure	method	nsnp	b	se	pval	lo_ci	up_ci	or	or_lci95	or_uci95
ebi-a-GCST90018875	zwpMCO	COL2A1	Lung cancer || id:ebi-a-GCST90018875	MR Egger	10	-0.0930562	0.157894262246639	0.571884853875927	-0.402529	0.216416537338657	0.911142277476409	0.668626968075548	1.24161945216529
ebi-a-GCST90018875	zwpMCO	COL2A1	Lung cancer || id:ebi-a-GCST90018875	Weighted median	10	-0.0452025	0.0344237645878445	0.189142760494952	-0.112673	0.0222680698642467	0.955803903600453	0.893442690123421	1.02251785395621
ebi-a-GCST90018875	zwpMCO	COL2A1	Lung cancer || id:ebi-a-GCST90018875	Inverse variance weighted	10	-0.054373	0.02729870584762	0.0463953811669498	-0.107878	-0.000867508	0.947078807055218	0.897736723043162	0.999132867966693
ebi-a-GCST90018875	zwpMCO	COL2A1	Lung cancer || id:ebi-a-GCST90018875	Simple mode	10	-0.0508778	0.0474058965615165	0.311095895182727	-0.143793	0.0420377102243835	0.950394756978486	0.866066655227531	1.0429338072771
ebi-a-GCST90018875	zwpMCO	COL2A1	Lung cancer || id:ebi-a-GCST90018875	Weighted mode	10	-0.0462193	0.0386647270185954	0.262482611943761	-0.122002	0.0295635948181478	0.954832572964825	0.885146478629013	1.03000493636573
